# Supplementary material for: Spin labels for 19F ENDOR distance determination: resolution, sensitivity and distance predictability
Source: Royal Society of Chemistry journal article supplement (doi:10.1039/d4cp02996h), 2024-01-01
Supplement: d4cp02996h1.pdf [file d4cp02996h1.pdf]

*Electronic Supplementary Information to*

**Spin Labels for  $^{19}\text{F}$  ENDOR Distance Determination:  
Resolution, Sensitivity and Distance Predictability**

*Alexey Bogdanov<sup>1\*</sup>, Longfei Gao<sup>2</sup>, Arina Dalaloyan<sup>1</sup>, Wenkai Zhu<sup>3</sup>,  
Manas Seal<sup>1</sup>, Xun-Cheng Su<sup>4</sup>, Veronica Frydman<sup>5</sup>, Yangping Liu<sup>2</sup>,  
Angela M. Gronenborn<sup>3</sup>, Daniella Goldfarb<sup>1\*</sup>*

*[\\*daniella.goldfarb@weizmann.ac.il](mailto:daniella.goldfarb@weizmann.ac.il) [\\*alexey.bogdanov@weizmann.ac.il](mailto:alexey.bogdanov@weizmann.ac.il)*

<sup>1</sup> Department of Chemical and Biological Physics, The Weizmann Institute of Science, P. O. Box 26, Rehovot, 7610001, Israel

<sup>2</sup> Tianjin Key Laboratory on Technologies Enabling Development of Clinical Therapeutics and Diagnostics, School of Pharmacy, Tianjin Medical University, Tianjin, 300070 P. R. China

<sup>3</sup> Department of Structural Biology, University of Pittsburgh, 4200 Fifth Ave, Pittsburgh, PA 15260, United States

<sup>4</sup> State Key Laboratory of Elemento-Organic Chemistry, Nankai University, Tianjin 300071 P. R. China

<sup>5</sup> Department of Chemical Research Support, The Weizmann Institute of Science, P. O. Box 26, Rehovot, 7610001, Israel

**Table of contents**

|                                                                                                                |     |
|----------------------------------------------------------------------------------------------------------------|-----|
| S1. Characterization of trityl spin labels.....                                                                | S2  |
| S2. Spin relaxation properties and Mims ENDOR spectra acquisition parameters.....                              | S4  |
| S3. Comparison of spectra of OXMA and CT02MA .....                                                             | S5  |
| S4. Spectral simulations.....                                                                                  | S6  |
| S5. $^{19}\text{F}$ ENDOR spectra of nitroxide-labeled proteins acquired at different field positions<br>..... | S7  |
| S5. Computational modeling of spin-labeled proteins conformations.....                                         | S9  |
| S6. Comparison of the signal-to-noise ratio for various constructs.....                                        | S11 |
| References.....                                                                                                | S13 |

## S1. Characterization of trityl spin labels

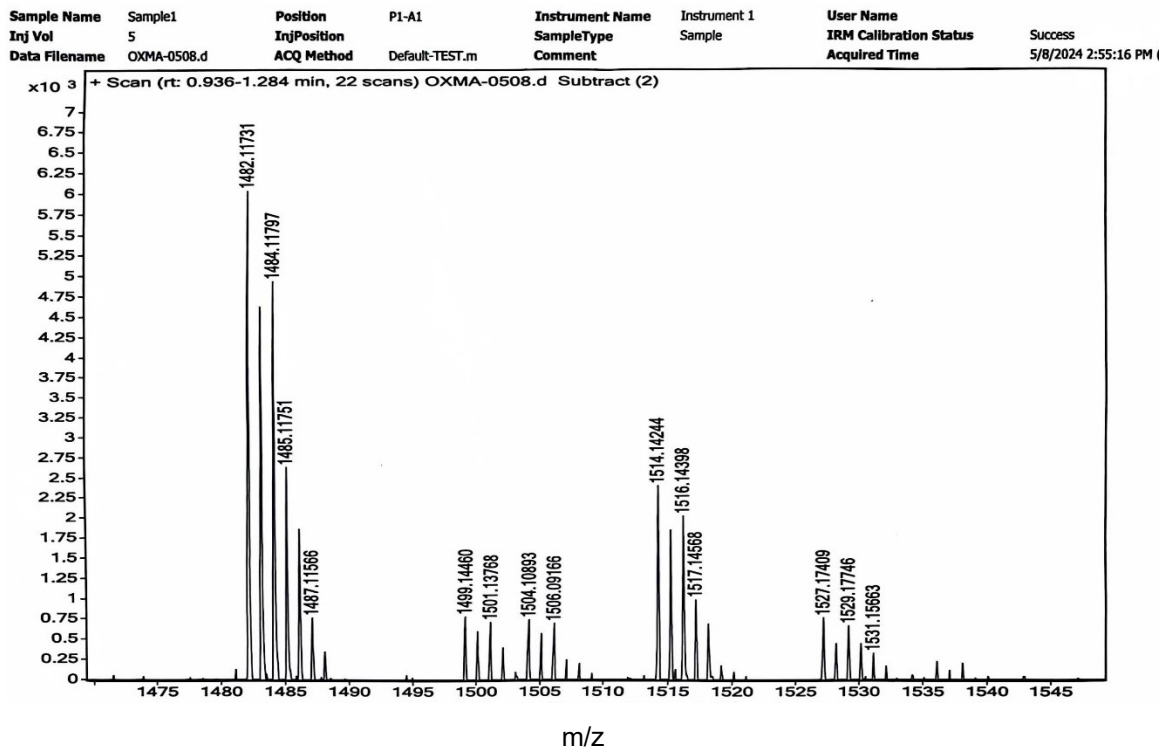

**Fig. S1.** HRMS(ESI+) m/z:  $[M]^+$ . Calculated for  $C_{58}H_{69}N_2O_{19}S_{12}^+$ :1482.1177; found: 1482.1173.

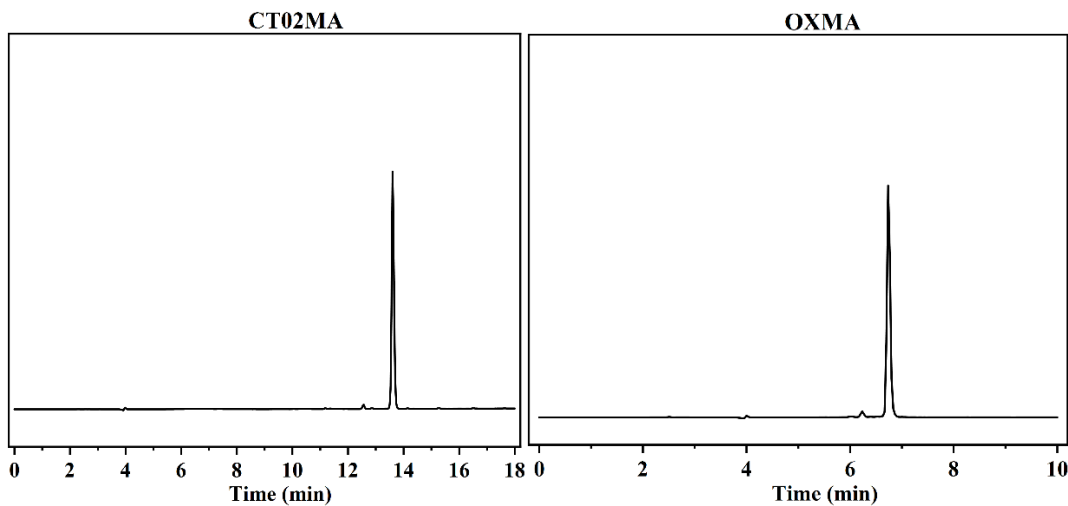

**Fig. S2.** HPLC chromatograms of CT02MA and OXMA. HPLC (ODS-3, 20 mM ammonium acetate/acetonitrile = 90:10-10:90, flow rate = 1.0 mL/min,  $\lambda = 254$  nm),  $t_R = 13.7$  min (CT02MA), 6.7 min (OXMA). The purities of these radicals were determined to be above 95%.

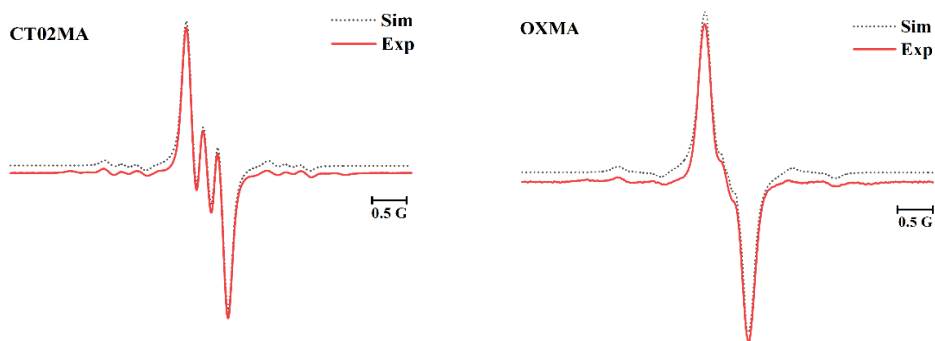

**Fig. S3.** Experimental (red solid line) and simulated (black dotted line) EPR spectra of CT02MA and OXMA in PBS at room temperature under anaerobic conditions.

HPLC analysis was performed using a CoulArray chromatography system from Shimadzu Analytical LC-20AT(JAPAN) with a C18 GL Science Inertsil ODS-3 column (250\*4.6 mm, 5  $\mu$ m). Elution was achieved using a gradient of ammonium acetate (20 mM, pH 6.8): acetonitrile of 90/10 to 10/90 over 20 min at a 1.0 mL/min flow rate.

Continuous wave (CW) electron paramagnetic resonance (EPR) spectra of the radicals (**Fig. S3**, red lines) were recorded using a Bruker EMX-plus X-band spectrometer at room temperature under anaerobic conditions. The instrumental settings were as follows: microwave power, 0.08 mW; time constant, 0.04 ms; modulation frequency, 100 kHz; modulation amplitude, 0.07 G. EPR measurements under anaerobic conditions were carried out by using a gas-permeable Teflon tube (i.d.=0.8 mm).

EPR spectral simulations (**Fig. S3**, black dotted lines) were carried out using the home-written EPR simulation program (ROKI\EPR) developed by Prof. Antal Rockenbauer.<sup>S1-3</sup> Simulation parameters are listed below. **CT02MA**: hyperfine splittings: 211 mG (1  $^{14}\text{N}$ ), 89 mG (1  $^1\text{H}$ , unresolved) 48 mG (2  $^1\text{H}$ , unresolved), 1220 mG (3%  $^{13}\text{C}$ ), 2350 mG (6%  $^{13}\text{C}$ ), 3320 mG (3%  $^{13}\text{C}$ ), linewidth 60 mG. **OXMA**: hyperfine splittings: 207 mG (1  $^{14}\text{N}$ ), 100 mG (1  $^1\text{H}$ , unresolved) 62 mG (2  $^1\text{H}$ , unresolved), 1100 mG (3%  $^{13}\text{C}$ ), 2390 mG (6%  $^{13}\text{C}$ ), 3470 mG (3%  $^{13}\text{C}$ ), linewidth 86 mG.

## **S2. Spin relaxation properties and Mims ENDOR spectra acquisition parameters**

**Table S1.** Comparison of relaxation properties of different spin labeled proteins and Mims ENDOR acquisition parameters.

| label   | protein       | temperature, K | $T_1$ , $\mu$ s | stretched exponential $\beta_1$ | $T_M$ , $\mu$ s | stretched exponential $\beta_2$ | $\tau$ , $\mu$ s | RF pulse length, $\mu$ s | Shot repetition time, ms |
|---------|---------------|----------------|-----------------|---------------------------------|-----------------|---------------------------------|------------------|--------------------------|--------------------------|
| Gd-DO3A | GB1 K31C      | 11             | 60              | 0.62                            | 8.90            | 1.47                            | 2                | 28                       | 6                        |
| Gd-DO3A | GB1 Q32C      | 11             | 60              | 0.62                            | 8.80            | 1.12                            | 2.5              | 26                       | 6                        |
| Gd-DO3A | Ub M1C        | 11             | 60              | 0.62                            | 11.00           | 0.91                            | 2                | 30                       | 6                        |
| Gd-DO3A | Ub T66C       | 11             | 60              | 0.62                            | 10.60           | 1.03                            | 2                | 28                       | 6                        |
| CT02MA  | GB1 K31C      | 40             | 13200           | 1.01                            | 2.50            | 1.28                            | 2                | 40                       | 20                       |
| OXMA    | GB1 Q32C      | 40             | 18300           | 1.16                            | 9.50            | 1.50                            | 4                | 40                       | 20                       |
| CT02MA  | Ub M1C        | 40             | 10600           | 0.92                            | 2.80            | 1.07                            | 3                | 80                       | 20                       |
| OXMA    | Ub M1C        | 40             | 18500           | 1.11                            | 6.70            | 1.30                            | 3                | 40                       | 20                       |
| CT02MA  | Ub T66C       | 40             | 3980            | 0.77                            | 2.40            | 1.34                            | 2                | 40                       | 20                       |
| MTSSL   | GB1 K31C      | 40             | 2200            | 0.82                            | 4.82            | 1.42                            | 2                | 35                       | 6                        |
| 5-MSL   | GB1 Q32C      | 40             | 1875            | 0.80                            | 7.20            | 1.17                            | 3                | 40                       | 6                        |
| MTSSL   | Ub M1C        | 40             | 2900            | 0.81                            | 5.10            | 0.96                            | 2                | 25                       | 6                        |
| MTSSL   | Ub T66C       | 25             | 10800           | 0.80                            | 7.57            | 1.33                            | 2                | 35                       | 10                       |
| Cu-NTA  | GB1 K28H Q32H | 5              | 3500            | 0.74                            | 5.00            | 1.10                            | 2                | 35-40                    | 3                        |

### S3. Comparison of spectra of OXMA and CT02MA

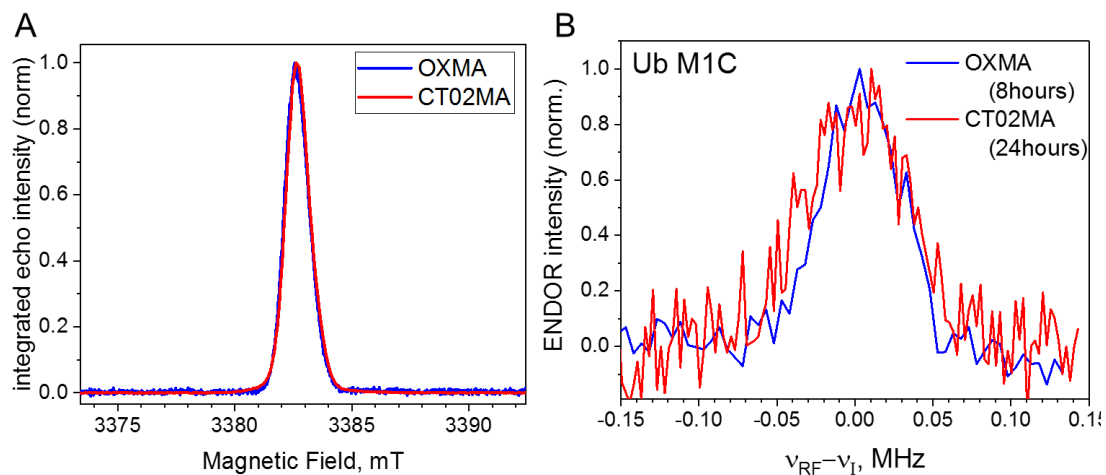

**Fig. S4.** ED- EPR (A) and  $^{19}\text{F}$  ENDOR (B) spectra of Ub M1C labeled with OXMA (blue line) and CT02MA (red lines)

#### **S4. Spectral simulations**

Numerical simulations of ENDOR spectra were carried out using software described previously,<sup>S4</sup> which was modified to take into account the possibility of orientation selection with nitroxide and Cu–NTA labels, as previously described.<sup>S3, S5, S6</sup> In essence, the echo-detected EPR spectra of the samples were simulated initially using  $g$ - and hyperfine interaction tensors (assumed to be coaxial) as fitting parameters. The derived optimized parameters are listed in **Table S2**. Subsequently, the relative contributions of the different  $g$ -tensor orientations, selected at various field positions, were determined from EPR spectra simulations and used for ENDOR spectra simulations. It was assumed that the vector connecting the unpaired electron with the  $^{19}\text{F}$  nucleus had a well-defined orientation in the  $g$ -tensor frame, parametrized by polar angles,  $\theta_F$  and  $\varphi_F$ . The excitation bandwidth for the orientation selection depends on the MW  $\pi/2$  pulse length used in the Mims sequence (leading to the experimentally used bandwidth of 50-60 MHz). However, it turned out that, for nitroxide labels, the ENDOR spectra were much more accurately simulated when a substantially larger excitation bandwidth was assumed (ca. 200 MHz). The most likely reason for this discrepancy is that orientational disorder of MTSSL labels within the protein causes an orientation distribution of the e-n dipolar vectors in the framework of nitroxide  $g$ -tensors. The exact degree of such orientation disorder is challenging to quantify, and using larger excitation bandwidth served as an efficient, albeit utterly phenomenological workaround.

**Table S2.** Principal values of the spin labels'  $g$ - and hyperfine interaction tensors, for which orientation selection was explicitly simulated.

|                 | MTSSL<br>GB1 K31C | MTSSL<br>Ub T66C | Cu-NTA<br>GB1 K28H Q32H |
|-----------------|-------------------|------------------|-------------------------|
| $g_{xx}$        | 2.0088            | 2.0085           | 2.0658                  |
| $g_{yy}$        | 2.0064            | 2.0063           | 2.0658                  |
| $g_{zz}$        | 2.0024            | 2.0026           | 2.2725                  |
| $A_{xx}$ , MHz  | 14.4              | 14.8             | –                       |
| $A_{yy}$ , MHz  | 19.4              | 14.8             | –                       |
| $A_{zz}$ , MHz  | 100.3             | 97.9             | 120                     |
| $\theta_F$ , °  | 90                | 0                | 50                      |
| $\varphi_F$ , ° | 0                 | 0                | –                       |

**S5.  $^{19}\text{F}$  ENDOR spectra of nitroxide-labeled proteins acquired at different field positions**

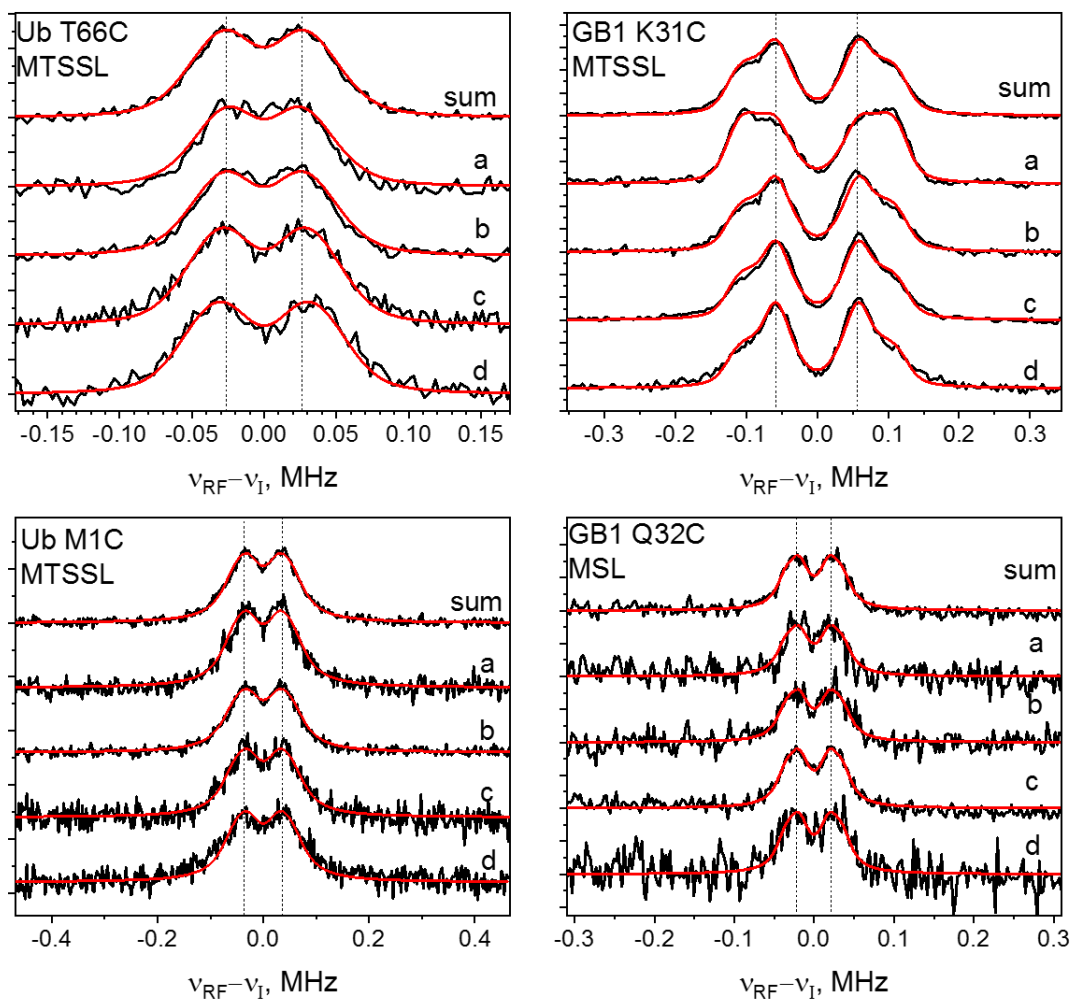

**Fig. S5.** Individual spectra of nitroxide labeled proteins (noted in each panel) recorded at various field positions (a, b, c, d; refer to Fig. 2A in the main text). Experimental spectra (black traces) and simulations (red traces) are superimposed. Vertical dashed lines, aligned with the maxima of the summed spectra, are shown to guide the eye.

**Table S3.** Simulation parameters of  $^{19}\text{F}$  ENDOR spectra of various spin-labeled proteins.

| label          | protein          | Single distance                    |                        |                    |                  | Gaussian distance distribution          |                                  |
|----------------|------------------|------------------------------------|------------------------|--------------------|------------------|-----------------------------------------|----------------------------------|
|                |                  | $a_{\perp}$ , <sup>**</sup><br>kHz | $r(\text{e-n})$ ,<br>Å | Lorentz lw,<br>kHz | Gauss<br>lw, kHz | $r_0(\text{e-n})$ , <sup>***</sup><br>Å | $\Delta r$ , <sup>***</sup><br>Å |
| <b>Gd-DO3A</b> | GB1 K31C         | 71.5                               | 10.1                   | 16.9               | 0                | 10.7                                    | 2.4                              |
| <b>Gd-DO3A</b> | GB1 Q32C         | –                                  | 15.2 <sup>*</sup>      | –                  | –                | –                                       | –                                |
| <b>Gd-DO3A</b> | Ub M1C           | 63.9                               | 10.5                   | 17.8               | 0                | 11.3                                    | 2.8                              |
| <b>Gd-DO3A</b> | Ub T66C          | 37.1                               | 12.6                   | 24.1               | 0                | 16.2                                    | 6.4                              |
| <b>CT02MA</b>  | GB1 K31C         | 40.0                               | 12.3                   | 12.8               | 0                | 12.6                                    | 2.0                              |
| <b>OXMA</b>    | GB1 Q32C         | –                                  | –                      | –                  | –                | –                                       | –                                |
| <b>OXMA</b>    | Ub M1C           | –                                  | –                      | –                  | –                | –                                       | –                                |
| <b>CT02MA</b>  | Ub T66C          | 57.1                               | 10.9                   | 32.6               | 0                | 14.5                                    | 6.3                              |
| <b>MTSSL</b>   | GB1 K31C         | 125.5                              | 8.4                    | 18.9               | 12.4             | 8.33                                    | 0.1                              |
| <b>MSL</b>     | GB1 Q32C         | 40.5                               | 12.2                   | 14.7               | 0                | 13.3                                    | 3.5                              |
| <b>MTSSL</b>   | Ub M1C           | 63.6                               | 10.5                   | 33                 | 0                | 13.9                                    | 2.85                             |
| <b>MTSSL</b>   | Ub T66C          | 54.0                               | 11.1                   | 11.6               | 28.2             | 14.0                                    | 6.4                              |
| <b>Cu-NTA</b>  | GB1 K28H<br>Q32H | 46.1                               | 11.7                   | 1.8                | 23.4             | –                                       | –                                |

<sup>\*</sup>Gd-F distance as obtained from PRE<sup>S7</sup> and ENDOR measurement on the satellite transitions of Gd(III).<sup>S4</sup>

<sup>\*\*</sup>  $a_{\perp}$  is defined in eq. (1), main text.

<sup>\*\*\*</sup> Gaussian distribution center  $r_0$  and width  $\Delta r$ , distribution probability density

according to  $dn/dr \propto \exp\left[-2\left(\frac{r-r_0}{\Delta r}\right)^2\right]$ . Lorentzian line shape with the same

width of 10 kHz was assumed in the simulations with the distance distribution for all proteins.



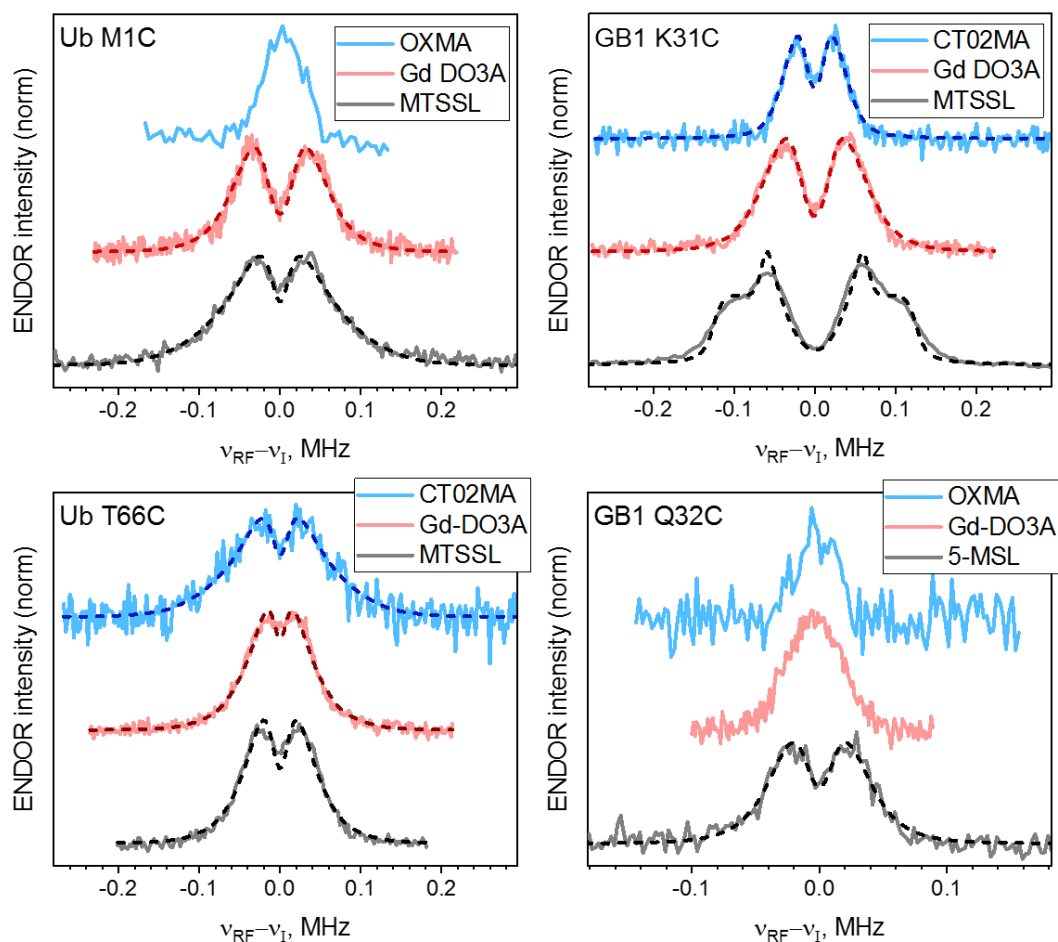

**Fig. S6.** Experimental spectra (solid lines) of the spin-labeled proteins (identical to those in **Fig. 3** of the main text) and their simulated counterparts (dashed lines). A Gaussian distribution of e-n distances and a fixed Lorentzian linewidth of 10 kHz was assumed for all spectra. The simulation parameters are listed in **Table S3**.

### **S5. Computational modeling of spin-labeled proteins conformations**

Prediction of electron–fluorine distance distributions was performed using the ChiLife software.<sup>S8</sup> The rotamer library for the CT02MA label was computed using the CREST software<sup>S9</sup> at the GFN2-xTB<sup>S10</sup> level, using water as the solvent. The same rotamer library was used to simulate the OXMA spin label, which differs from CT02MA only by the flexible side groups, the inclusion of which in the rotamer library would be impractical.

**MTSSL-Wizard algorithm (dihedral\_sigma=np.inf)**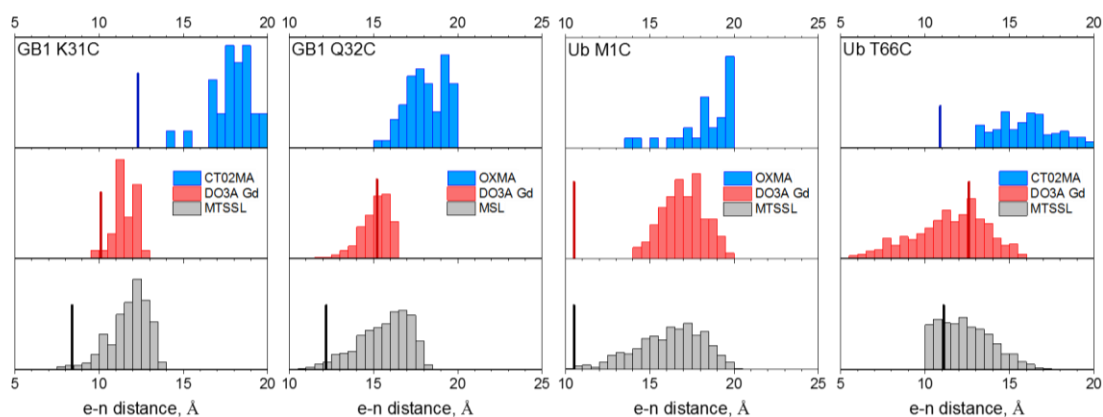**Off-rotamer sampling (dihedral\_sigma=35degrees)**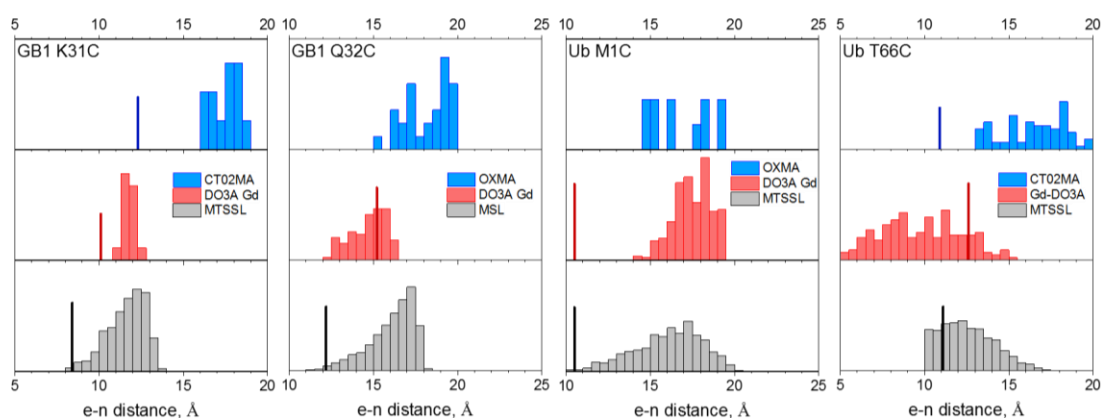**Rotamer library approach (~MMM) (dihedral\_sigma=1 degree, forgive=0.8)**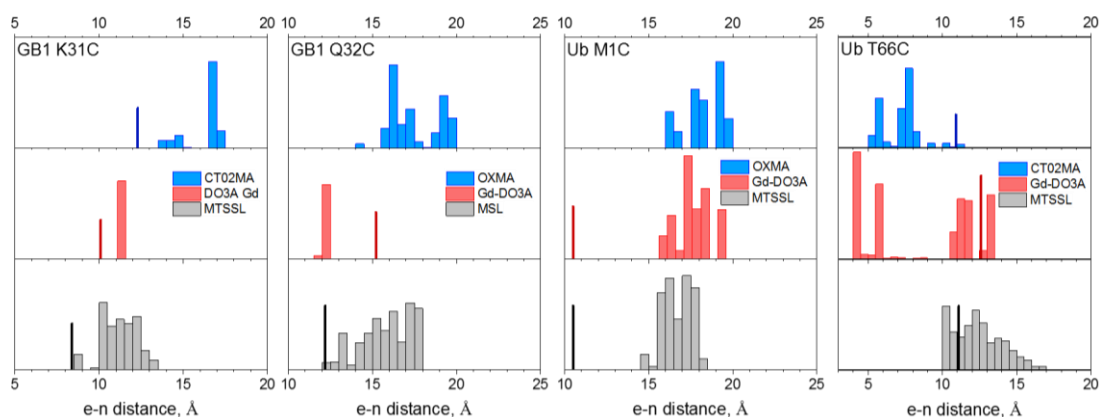

**Fig. S7.** Modeling of spin label rotamers using three computational approaches: free sampling of mobile dihedral angles (top panels), off-rotamer sampling<sup>S11</sup> (middle panels) and the rotamer library approach (bottom panels); all results were obtained using the ChiLife software. Vertical lines correspond to the experimental distances obtained by simulation of ENDOR spectra using a single e-n distance approach, whereas the experimental Gd-F distance for GB1 Q32C Gd-DO3A is shown as obtained from PRE<sup>S7</sup> and ENDOR measurement on the satellite transitions of Gd(III).<sup>S4</sup>

### S6. Comparison of the signal-to-noise ratio for various constructs

**Table S4.** Experimental signal-to-noise ratios (SNR) of <sup>19</sup>F ENDOR spectra for the different samples, and other related parameters, namely: spectrometer used (cf **Section S3**), temperature, acquisition time, protein concentration, ENDOR efficiency  $F_{\text{ENDOR}}$ . Relative values of SNR predicted by equation (2) in main text are listed in the last column. Npts – number of points in the spectrum, sqrt(hrs) – square root of acquisition time.

| label/field position | protein  | spectrometer | temperature, K | SNR of spectrum | Acquisition time, hrs | SNR/sqrt(hrs) | $F_{\text{ENDOR}}$ , % | concentration, $\mu\text{M}$ | Experimental SNR/sqrt(hrs)/Npts/concentration, $\times 10^3$ | relative $V_0^*$ | rel. SNR <sub>ENDOR</sub> , $\times 10^3$ (eq. (2), main text) | rel. SNR, $\times 10^3$ (eq. (2), main text) |
|----------------------|----------|--------------|----------------|-----------------|-----------------------|---------------|------------------------|------------------------------|--------------------------------------------------------------|------------------|----------------------------------------------------------------|----------------------------------------------|
| Gd-DO3A              | GB1 K31C | 1            | 11             | 30.1            | 10.5                  | 9.28          | 6.01                   | 8                            | <b>4.64</b>                                                  | 1.0              | <b>9.66</b>                                                    | <b>9.66</b>                                  |
| Gd-DO3A              | GB1 Q32C | 1            | 11             | 15.7            | 10                    | 4.98          | 1.79                   | 11                           | <b>2.98</b>                                                  | 1.0              | <b>2.37</b>                                                    | <b>2.37</b>                                  |
| Gd-DO3A              | Ub M1C   | 1            | 11             | 14.6            | 20.5                  | 3.23          | 1.16                   | 15                           | <b>0.72</b>                                                  | 1.0              | <b>1.66</b>                                                    | <b>1.66</b>                                  |
| Gd-DO3A              | Ub T66C  | 1            | 11             | 33.5            | 19                    | 7.69          | 2.49                   | 13                           | <b>1.97</b>                                                  | 1.0              | <b>3.77</b>                                                    | <b>3.77</b>                                  |
| CT02MA               | GB1 K31C | 2            | 40             | 19.1            | 24.5                  | 3.86          | 1.03                   | 220                          | <b>0.07</b>                                                  | 0.342            | <b>0.37</b>                                                    | <b>0.13</b>                                  |
| OXMA                 | GB1 Q32C | 2            | 40             | 7.3             | 23.3                  | 1.51          | 0.42                   | 20                           | <b>0.62</b>                                                  | 0.342            | <b>0.44</b>                                                    | <b>0.15</b>                                  |
| CT02MA               | Ub M1C   | 2            | 40             | 7.2             | 21.3                  | 1.57          | 0.57                   | 110                          | <b>0.12</b>                                                  | 0.342            | <b>0.13</b>                                                    | <b>0.05</b>                                  |
| OXMA                 | Ub M1C   | 1            | 40             | 16.8            | 8                     | 5.94          | 1.17                   | 110                          | <b>0.89</b>                                                  | 0.342            | <b>1.10</b>                                                    | <b>0.38</b>                                  |
| CT02MA               | Ub T66C  | 2            | 40             | 10.4            | 22                    | 2.21          | 0.88                   | 160                          | <b>0.06</b>                                                  | 0.342            | <b>0.26</b>                                                    | <b>0.09</b>                                  |
| MTSSL                | a        | GB1 K31C     | 1              | 40              | 25.6                  | 7.1           | 9.61                   | 95                           | <b>0.50</b>                                                  | 0.0823           | <b>13.60</b>                                                   | <b>1.12</b>                                  |
|                      | b        |              |                |                 | 37.5                  | 4.5           | 17.70                  | 95                           | <b>0.47</b>                                                  | 0.1487           | <b>16.12</b>                                                   | <b>2.40</b>                                  |
|                      | c        |              |                |                 | 56.5                  | 5.8           | 23.45                  | 95                           | <b>1.23</b>                                                  | 0.1035           | <b>18.64</b>                                                   | <b>1.93</b>                                  |
|                      | d        |              |                |                 | 59.8                  | 9             | 19.95                  | 95                           | <b>1.05</b>                                                  | 0.0558           | <b>21.33</b>                                                   | <b>1.19</b>                                  |
| 5-MSL                | a        | GB1 Q32C     | 1              | 40              | 7.7                   | 14            | 2.06                   | 120                          | <b>0.06</b>                                                  | 0.0800           | <b>2.11</b>                                                    | <b>0.17</b>                                  |
|                      | b        |              |                |                 | 11.4                  | 6             | 4.64                   | 120                          | <b>0.14</b>                                                  | 0.1487           | <b>2.40</b>                                                    | <b>0.36</b>                                  |
|                      | c        |              |                |                 | 11.6                  | 16.3          | 2.87                   | 120                          | <b>0.09</b>                                                  | 0.106            | <b>1.96</b>                                                    | <b>0.21</b>                                  |
|                      | d        |              |                |                 | 7.4                   | 5.3           | 3.21                   | 120                          | <b>0.10</b>                                                  | 0.0592           | <b>2.89</b>                                                    | <b>0.17</b>                                  |
| MTSSL                | a        | Ub M1C       | 1              | 40              | 17.6                  | 21.2          | 3.82                   | 50                           | <b>0.19</b>                                                  | 0.0753           | <b>17.79</b>                                                   | <b>1.34</b>                                  |
|                      | b        |              |                |                 | 25.8                  | 9.7           | 8.29                   | 50                           | <b>0.41</b>                                                  | 0.1487           | <b>13.40</b>                                                   | <b>1.99</b>                                  |
|                      | c        |              |                |                 | 11.1                  | 11.3          | 3.32                   | 50                           | <b>0.17</b>                                                  | 0.0858           | <b>17.64</b>                                                   | <b>1.51</b>                                  |
|                      | d        |              |                |                 | 12.1                  | 29.3          | 2.24                   | 50                           | <b>0.11</b>                                                  | 0.0433           | <b>15.84</b>                                                   | <b>0.69</b>                                  |
| MTSSL                | a        | Ub T66C      | 2              | 25              | 12.3                  | 22            | 2.61                   | 120                          | <b>0.14</b>                                                  | 0.0986           | <b>6.64</b>                                                    | <b>0.66</b>                                  |
|                      | b        |              |                |                 | 14.2                  | 16.3          | 3.53                   | 120                          | <b>0.18</b>                                                  | 0.1879           | <b>7.43</b>                                                    | <b>1.40</b>                                  |
|                      | c        |              |                |                 | 14.5                  | 25.7          | 2.87                   | 120                          | <b>0.15</b>                                                  | 0.1134           | <b>9.00</b>                                                    | <b>1.02</b>                                  |
|                      | d        |              |                |                 | 14.2                  | 53            | 1.96                   | 120                          | <b>0.10</b>                                                  | 0.0571           | <b>8.74</b>                                                    | <b>0.50</b>                                  |
| Cu-NTA               | g        | GB1 K28H     | 2              | 5               | 18.6                  | 11            | 5.61                   | 420                          | <b>0.08</b>                                                  | 0.085            | <b>9.04</b>                                                    | <b>0.77</b>                                  |
|                      | a        | Q32H         | 5              | 8.0             | 53                    | 1.10          | 4.34                   | 420                          | <b>0.03</b>                                                  | 0.0099           | <b>11.05</b>                                                   | <b>0.11</b>                                  |

\* The relative values of  $V_0$  for each label were estimated experimentally by measuring the integrated spin echo intensity of 100  $\mu\text{M}$  solutions of the corresponding free label in glycerol- $d_3$ : $D_2O$  (1:4). The values are given relative to Gd-DO3A at 11 K, taken as 1.0. The same value of  $V_0$  was assumed for OXMA and CT02MA, and for 5-MSL and MTSSL. For nitroxides and Cu(II),  $V_0$  was further normalized based on the relative EPR spectrum intensity at the corresponding magnetic field positions.

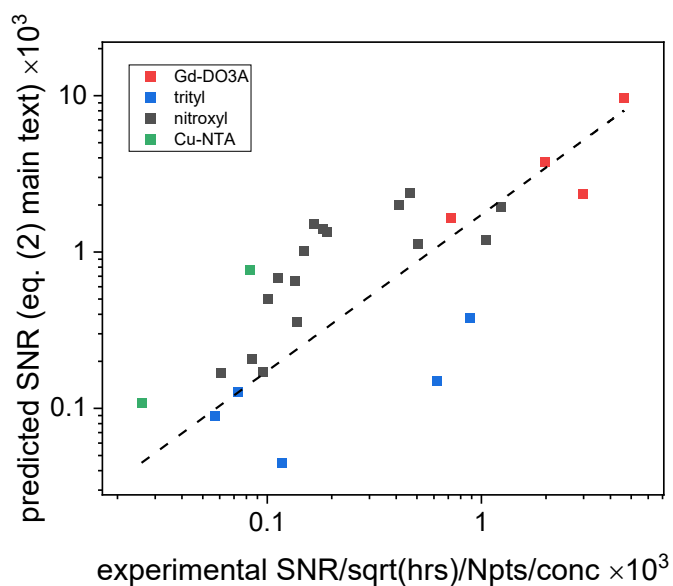

**Fig. S8.** Values of relative SNR predicted by eq. (2) in the main text, vs. experimentally obtained values of SNR per sqrt time, frequency point and concentration (corresponding values are listed in **Table S4** above). The dashed line corresponds to linear dependence with coefficient of determination  $R^2=0.84$ .

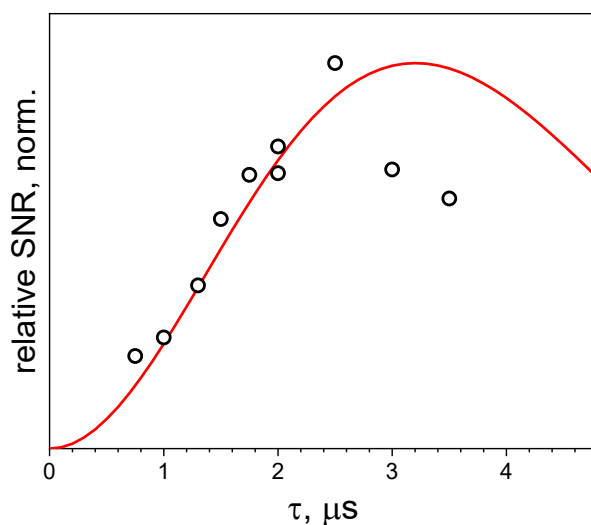

**Fig. S9.** Experimentally obtained values of SNR (black points) of  $^{19}\text{F}$  ENDOR spectra of 240  $\mu\text{M}$  GB1 K31C labeled with Gd-DO3A as a function of delay time  $\tau$  in Mims ENDOR sequence and theoretical curve (red line) obtained from eq. (2) (main text) assuming that  $F_{\text{ENDOR}} \propto \sin^2(\pi \cdot a\tau)$  calculated with the experimentally determined parameters  $T_M=6.3 \mu\text{s}$ ,  $\beta_2=1.6$ ,  $a=71.5 \text{ kHz}$ . Both experimental and theoretical values are normalized.

## References

- S1. A. Rockenbauer and L. Korecz, *Applied Magnetic Resonance*, 1996, **10**, 29-43.
- S2. A. Rockenbauer, T. Szabó-Plánka, Z. Árkosi and L. Korecz, *Journal of the American Chemical Society*, 2001, **123**, 7646-7654.
- S3. H. Wiechers, A. Kehl, M. Hiller, B. Eltzner, S. F. Huckemann, A. Meyer, I. Tkach, M. Bennati and Y. Pokern, *J. Magn. Reson.*, 2023, **353**, 107491.
- S4. A. Bogdanov, V. Frydman, M. Seal, L. Rapatskiy, A. Schnegg, W. Zhu, M. Iron, A. M. Gronenborn and D. Goldfarb, *Journal of the American Chemical Society*, 2024, **146**, 6157-6167.
- S5. A. Meyer, A. Kehl, C. Cui, F. A. K. Reichardt, F. Hecker, L.-M. Funk, M. K. Ghosh, K.-T. Pan, H. Urlaub, K. Tittmann, J. Stubbe and M. Bennati, *J. Am. Chem. Soc.*, 2022, **144**, 11270-11282.
- S6. A. Meyer, S. Dechert, S. Dey, C. Höbartner and M. Bennati, *Angew. Chem. Int. Ed.*, 2020, **59**, 373-379.
- S7. M. Seal, W. Zhu, A. Dalaloyan, A. Feintuch, A. Bogdanov, V. Frydman, X.-C. Su, A. M. Gronenborn and D. Goldfarb, *Angew. Chem. Int. Ed.*, 2023, **62**, e202218780.
- S8. M. H. Tessmer and S. Stoll, *PLOS Computational Biology*, 2023, **19**, e1010834.
- S9. P. Pracht, F. Bohle and S. Grimme, *Phys. Chem. Chem. Phys.*, 2020, **22**, 7169-7192.
- S10. C. Bannwarth, S. Ehlert and S. Grimme, *Journal of Chemical Theory and Computation*, 2019, **15**, 1652-1671.
- S11. M. H. Tessmer, E. R. Canarie and S. Stoll, *Biophys. J.*, 2022, **121**, 3508-3519.
